# Supplementary material for: Immunomodulatory Treatment of Multisystem Inflammatory Syndrome in Children
Source: PubMed Central journal article supplement (PMC8220965; doi:10.1056/nejmoa2102968), 2021-06-16
Supplement: NEJMoa2102968_data-sharing.pdf [file NEJMoa2102968_data-sharing.pdf]

## Data Sharing Statement

McArdle AJ, Vito O, Patel H, et al. Treatment of Multisystem Inflammatory Syndrome in Children. N Engl J Med. DOI: 10.1056/NEJMoa2102968.

| Question                                                            | Authors' Response                                                                                                                                                                                                                                                                                                                          |
|---------------------------------------------------------------------|--------------------------------------------------------------------------------------------------------------------------------------------------------------------------------------------------------------------------------------------------------------------------------------------------------------------------------------------|
| Will the data collected for your study be made available to others? | Yes.                                                                                                                                                                                                                                                                                                                                       |
| Would you like to offer context for your decision?                  | BATS has collected de-identified data from multiple institutions in many countries. Each institution has signed an agreement with Imperial College on data security. We will need to assess requests for data on a case-by-case basis to ensure that the data that are provided fall within the existing agreements within the consortium. |
| Which data?                                                         | De-identified clinical and laboratory findings and response to treatment for the cohort included in this study.                                                                                                                                                                                                                            |
| Additional information about data                                   | Any data provided will be de-identified and will conform to the agreements within the consortium for data sharing.                                                                                                                                                                                                                         |
| How or where can the data be obtained?                              | On request to the corresponding author.                                                                                                                                                                                                                                                                                                    |
| When will data availability begin?                                  | On publication of the manuscript. However, as approval for all data will have to be obtained from the consortium and partner institutions, approximately 3 months may be required before the data is provided.                                                                                                                             |
| When will data availability end?                                    | 2 years after publication.                                                                                                                                                                                                                                                                                                                 |
| Will any supporting documents be available?                         | The study handbook and statistical analysis plan are available with the online publication at NEJM.org.                                                                                                                                                                                                                                    |
| Which supporting documents?                                         | —                                                                                                                                                                                                                                                                                                                                          |
| Additional information about supporting documents                   | Additional information not covered by these documents can be provided on request to the study coordinator or corresponding author.                                                                                                                                                                                                         |
| How or where can supporting documents be obtained?                  | In the online supplementary materials to this publication or on request as above.                                                                                                                                                                                                                                                          |
| When will supporting documents availability begin?                  | On publication.                                                                                                                                                                                                                                                                                                                            |

|                                                  |                                                                               |
|--------------------------------------------------|-------------------------------------------------------------------------------|
| When will supporting documents availability end? | 2 years after conclusion of recruitment.                                      |
| To whom will data be available?                  | Legitimate researchers and clinicians from medical and academic institutions. |
| For what type of analysis or purpose?            | Only for academic and clinical research.                                      |
| By what mechanism?                               | —                                                                             |
| Any other restrictions?                          | —                                                                             |
| Additional information                           | —                                                                             |

This statement was posted on June 16, 2021, at NEJM.org.
